1 **High-throughput experimental evolution using barcoded strains of *Saccharomyces cerevisiae***

2

3 Vincent J. Fasanello\*, Carlos A. Botero†, Ping Liu\*, Justin C. Fay‡

4

5 \* Division of Biology and Biomedical Sciences; Washington University School of Medicine in St.

6 Louis; St. Louis, Missouri; 63110

7 † Department of Biology; Washington University in St. Louis; St. Louis, Missouri; 63130

8 ‡ University of Rochester; Rochester, New York; 14627

- 9 **Running Title:** Barcoded Experimental Evolution
- 10 **Keywords:** Experimental Evolution, *Saccharomyces cerevisiae*, Genetic Barcode, Fitness Assay
- 11 **Corresponding Author:** Vincent Fasanello, Washington University in St. Louis, Campus Box
- 12 1137, One Brookings Drive, St Louis, MO 63130-4899

13  
14  
15  
16  
17  
18  
19  
20  
21  
22  
23  
24  
25  
26  
27  
28

## ABSTRACT

Experimental evolution of microbes can be used to empirically address a wide range of questions about evolution. Because fitness assays are a central component of experimental evolution, they can limit the scope and throughput of such studies. We created an experimental evolution system in *Saccharomyces cerevisiae* that utilizes genetic barcoding to overcome this challenge. We confirm that barcode insertions do not alter fitness and can be used to detect fitness differences of 2%. Using this system, we examine here the effects of ploidy, stress, and population bottleneck size on the evolutionary dynamics and fitness gains in a total of 76 experimentally evolving populations by conducting 2,136 fitness assays and analyzing 532 longitudinal-evolutionary samples collected from evolving populations. Our experimental treatments generated distinct fitness effects and evolutionary dynamics quantified via multiplexed fitness assays and barcode lineage tracking, respectively, demonstrating the utility of this new resource for designing and improving high-throughput studies of experimental evolution. The approach described here provides a framework for future studies using this experimental system.

29  
30

## INTRODUCTION

31  
32  
33  
34

Experimental evolution in microorganisms such as yeast, bacteria, and viruses has been used to answer evolutionary questions that are experimentally intractable in organisms with longer generation times (de Varigny 1892; Garland and Rose 2009; Kassen 2014; Van den Bergh et al.

35 2018). A central benefit of most experimental evolution systems is the ability to replicate and  
36 repeat evolution as well as the ability to store and compete evolved, intermediate, and  
37 ancestral strains (Van den Bergh et al. 2018). Indeed, if there is a single unifying theme to what  
38 we have learned from experimental evolution it is that adaptation is universal and often  
39 repeatable due to parallel changes down to the molecular level (Burke, Liti, and Long 2014;  
40 Kohn and Anderson 2014; Bailey et al. 2017; Graves et al. 2017; Bailey, Guo, and Bataillon  
41 2018). The power of this approach has led to numerous investigations of the effects of  
42 population size (Schoustra et al. 2009; A. C. Gerstein et al. 2011; Bailey et al. 2017) and  
43 structure (Bell and Gonzalez 2011; Kryazhimskiy, Rice, and Desai 2012; Low-Décarie et al. 2015),  
44 mutation rate (Lenski, Sniegowski, and Gerrish 1997; Loewe, Textor, and Scherer 2003; Perfeito  
45 et al. 2007; Swings et al. 2017), and various environmental treatments (B. S. Hughes, Cullum,  
46 and Bennett 2007; R. Dhar et al. 2011; Riddhiman Dhar et al. 2013; Zhou et al. 2013; Horinouchi  
47 et al. 2015; Huang et al. 2018).

48  
49 Measuring adaptation by changes in fitness is a core requirement of experimental evolution  
50 that often limits its implementation. Fitness assays involve direct competition of individuals or  
51 populations against one another or a common reference, and traditionally have been calculated  
52 using neutral markers scored by plating assays. For example, the long-term experimental  
53 evolution conducted by Lenski and colleagues is scored by counting colonies that can ferment  
54 arabinose based on colony color (Lenski et al. 1991). Many recent studies use fluorescently  
55 marked strains such that co-cultured strains can be counted by flow-cytometry (Gresham et al.  
56 2008; A. C. Gerstein et al. 2011; Selmecki et al. 2015). However, the number of fitness assays,

57 and thereby the resolution of those assays remain limited, which poses a challenge for large-  
58 scale projects. The primary constraint limiting the scale of these studies is that measuring  
59 fitness requires replicate assays, often under a variety of conditions. For example, an  
60 experiment with 100 strains evolved in a single environment would require 600 fitness assays if  
61 one were to measure, in triplicate, the fitness of each ancestral strain and each evolved strain  
62 in relation to a common reference. Additionally, each of these assays would require measuring  
63 the frequency of the two strains at the beginning and end of the competition. Equally important  
64 is the ability to detect small changes in fitness, which is directly related to the number of  
65 replicate assays per strain and the noise of the assay itself.

66  
67 Genetic barcodes can vastly increase the throughput of these analyses through pooled-fitness  
68 assay designs. In a barcoding approach, each strain is marked by insertion of a unique neutral  
69 DNA sequence into its genome (i.e., its barcode), enabling the easy quantification of the relative  
70 abundance of multiple strains when they are simultaneously competed against a common  
71 reference. Microarrays (Roth et al. 2009) and more recently, direct sequencing of barcodes  
72 (Giaever and Nislow 2014), have been used to measure the effects of thousands of single gene  
73 deletions using this approach. Barcodes have also been used in experimental evolution. A pool  
74 of half a million barcoded yeast strains made it possible to detect and track the fate of each  
75 barcoded lineage (Blundell and Levy 2014; Levy et al. 2015). Other research with these  
76 barcoded strains has focused on isolating strains with adaptive mutations, tracking lineages  
77 during evolution and quantifying fitness via competition-based fitness assays (Venkataram et al.  
78 2016; Li et al. 2018).

79

80 In this study we describe a novel set of barcoded yeast strains and characterize their utility for  
81 experimental evolution. The system is composed of a collection of *Saccharomyces cerevisiae*  
82 strains, individually barcoded with unique 20 bp sequences inserted upstream of the *HO* locus;  
83 this barcoding strategy offers a number of advantages for experimental evolution. First, cross-  
84 contamination between populations with different barcodes can be detected and monitored.  
85 Second, populations can be initiated with mixtures of multiple barcodes for tracking adaptive  
86 dynamics (Kao and Sherlock 2008; Selmecki et al. 2015). Finally, fitness can be measured from  
87 the entire set of strains in a single pooled fitness assay, which dramatically increases efficiency  
88 relative to earlier methods. To demonstrate the capabilities of this system we began by  
89 conducting a series of proof-of-concept fitness assays and subsequently applied what we  
90 learned in a short, 25-day (~250-generation) experimental evolution. These analyses confirm  
91 that barcode insertions (1) do not alter the fitness of our source strains, (2) enable the  
92 detection of fitness differences as small as 2%, and (3) provide a means of measuring fitness  
93 differences and evolutionary dynamics for individual lineages from pooled samples obtained at  
94 different stages of experimental evolution. We highlight the advantages of multiplexing  
95 samples with indexing and the importance of limiting molecular contamination between initial  
96 sampling and library construction. Taken together, this system represents a new resource for  
97 designing and improving high-throughput studies in experimental evolution.

98

99

## MATERIALS AND METHODS

100

## 101 **Strains, media and culture methods**

102 Barcoded yeast strains were constructed using two haploid derivatives of a diploid strain  
103 collected from an Oak tree in Pennsylvania (YPS163) (Sniegowski, Dombrowski, and Fingerman  
104 2002): YJF153 (MATa, *HO::dsdAMX4*) and YJF154 (MATalpha, *HO::dsdAMX4*). Barcoded kanMX  
105 deletion cassettes were amplified from the MoBY plasmid collection (Magtanong et al. 2009)  
106 with primers containing homology to the promoter region (-1,129 to -1,959) of *HO*. A set of 92  
107 barcoded cassettes were selected based on confirmation of correct barcodes by sequencing  
108 (Table S1), then transformed into YJF153 and confirmed by PCR. Barcoded diploid strains were  
109 made by mating barcoded haploids (YJF153) to YJF154, and confirming diploids by mating-type  
110 PCR (Huxley, Green, and Dunbam 1990). Strains were stored at -80°C as 15% glycerol stocks.

111

112 All evolution and fitness assays were conducted in complete minimal medium (CM;2% dextrose,  
113 0.17% yeast nitrogen base without amino acid and ammonium sulfate, 0.5% ammonium  
114 sulfate, 0.13% dropout mix complete without yeast nitrogen base) with or without additional  
115 stresses in 96-deep well plates (2.2-ml poly-propylene plates, square well, v-conical bottom;  
116 Abgene AB-0932) covered with rayon acrylate breathable membranes (Thermo Scientific,  
117 1256705). Growth plates were incubated at 30°C for 24 hours inside an incubator (VWR, Forced  
118 Air Incubator, basic, 120v, 7 cu. ft.) with agitation using a horizontal electromagnetic microplate  
119 shaker (Union Scientific LLC, 9779-TC). Saturated 24-hour culture was diluted (1:1000) into  
120 fresh medium at the same time each day to initialize the next round of growth for all evolution  
121 and fitness assays.

122

123 Starting material for all evolution and fitness assays originated from -80°C freezer stocks of the  
124 barcoded yeast strains. Yeast were revived from -80°C freezer stocks via a single round of  
125 growth (1 day, 10 generations) under standard culture conditions for these assays. Samples  
126 collected during our experiments were stored as both (1) 15% glycerol stocks at -80°C to  
127 maintain viable freezer stocks of yeast populations, and (2) pelleted samples at -20°C for DNA  
128 extraction.

129

### 130 **Experimental design**

131 **Proof-of-concept fitness assays:** The design of this new system for experimental evolution  
132 began with a proof-of-concept analysis in which (1) methods were optimized, and (2) it was  
133 confirmed that the fitness of multiple strains in pooled samples could be simultaneously and  
134 accurately measured by sequencing-based competition assay methods. This initial step involved  
135 measuring the fitness of 91 barcoded yeast strains relative to an ancestral reference strain  
136 simultaneously using a sequencing-based fitness assay (Figure 1, A.). Ten replicate fitness assays  
137 were conducted under standard culture conditions. Briefly, 92 yeast strains were revived from -  
138 80°C freezer stocks, mixed in equal proportions (i.e., such that each strain comprised 1/92 of  
139 the pooled population), and diluted (1:1000) into fresh medium to initialize the two-day proof-  
140 of-concept fitness assays. Samples were obtained from the undiluted initial mixtures and, 20  
141 generations later, from the final overnight population cultures. Fitness was measured by the  
142 change in barcode abundance relative to a 'reference' strain (d1H10) from 10 replicates over  
143 the two-day period of approximately 20 generations, for a total of 920 fitness assays (92  
144 barcodes x 10 replicates). See "Fitness Calculations", below for a full description of the



145 competition-based fitness assay methodology and for calculations of fitness from barcode  
146 abundance data. DNA was isolated separately for each sample using a ZR Fungal/Bacterial DNA  
147 Kit (Zymo Research D6005) in individual 2.0 mL screw-cap tubes following the manufacturer's  
148 instructions. Physical cell disruption by bead-beating was carried out in a mixer mill (Retsch,  
149 MM 300) at 30 Hz ( $1800 \text{ min}^{-1}$ ) for ten minutes (1-minute on, 1-minute off, times ten cycles).  
150 Following extraction, DNA was amplified with forward/reverse primers containing a 9-12 bp  
151 index for multiplex sequencing. PCR products were quantified, pooled and purified to form a  
152 single multiplexed library for sequencing. Additional control samples were also included in the  
153 library to track barcode cross-contamination. See "Library Construction and Sequencing",  
154 below, for a detailed description of the library preparation protocol used for these and all other  
155 samples.

156  
157 **250-Generation evolution experiment:** After establishment of the feasibility of the analysis  
158 strategy and optimization of the culture, assay, and processing methods, yeast strains were  
159 evolved for 25 days (i.e., ca. 250 generations at 9.97 generations per day) under different  
160 scenarios of selection in a second set of experiments. Specifically, 152 yeast strains were  
161 evolved by serial dilution in one of six different treatments (Figure 1, B1.; See Table S2 for  
162 treatment descriptions). Evolutionary treatments involved growth in either complete media  
163 (CM), CM with ethanol (8% by volume) or CM with NaCl (0.342 M). Serial transfers were  
164 achieved either through standard dilution (1:1000), reduced dilution (1:250), or increased  
165 dilution (1:4000). Haploid and diploid yeast were evolved under standard conditions to assess  
166 the effects of ploidy. To initialize the evolution experiment, barcoded yeast strains were revived

167 from -80°C freezer stocks. Barcoded yeast pairs slated to evolve in sympatry were then mixed in  
168 equal proportions and diluted in fresh medium, according to the experimental design, to begin  
169 the 250 generations of evolution.

170

171 Samples were obtained from the initial undiluted mixtures and on day 25 (ca. 250 generations  
172 later), from the final overnight population cultures to serve as the starting material for the  
173 Generation-0 fitness assays and Generation-250 fitness assays, respectively (See: *End-point*  
174 *assay of relative fitness change*). Additional Samples were obtained at generations 0, 100, 150,  
175 200, 220, 240, and 250 for evolutionary dynamics analysis (See: *Evolutionary Dynamics*). Two  
176 assays, evolutionary dynamics and end-point relative fitness, were developed to characterize  
177 the evolutionary processes and fitness change outcomes observed in the 250-generation  
178 evolution experiment:

179

180 *Evolutionary Dynamics*: Relative proportions of pairs of barcoded yeast strains evolved in  
181 sympatry were quantified at generations 0, 100, 150, 200, 220, 240, and 250 from a total of 532  
182 evolutionary dynamics samples collected from the evolving populations. Briefly, evolutionary  
183 dynamics samples were pooled for DNA extraction such that there was no barcode overlap  
184 within pools. DNA was subsequently extracted (see the “Proof-of-concept fitness assays”  
185 section, above, for details). Libraries were constructed for sequencing as described in the  
186 “Library construction and sequencing” section, below. From these evolutionary dynamics data,  
187 the time-point (t-max) and magnitude (m-max) of the maximum change in relative abundance  
188 in comparison to the starting conditions, the time-point (t-max-rate) and magnitude (m-max-

189 rate) of the maximum rate of change between adjacent time-points, the time-point (t-max-diff)  
190 max difference (m-max-diff) in BC proportions, and the total cumulative change in sympatric  
191 barcode relative abundance across all time-points were quantified. Barcodes approaching  
192 fixation (hereafter referred to as “fixed barcodes”) were also noted and were defined as cases  
193 in which a single barcode from the sympatric barcode pair obtained (and maintained) a  
194 proportion of 0.95 or greater by (through) generation 250 of the evolution experiment.

195

196 *End-point assays of relative fitness:* The second assay type, the “end-point assay of relative  
197 fitness”, was designed to assess the fitness of a given focal strain relative to a reference via  
198 barcoded competition-based fitness assay; these measures, if taken at the start and end of an  
199 experimental evolution, provide a means of measuring fitness change. In this case, the assay  
200 involved quantifying barcode fitness using pooled samples from generation 0 (Figure 1, B2.)  
201 and generation 250 (Figure 1, B3.) from the 250-generation evolution experiment (Figure 1,  
202 B1.). Briefly, Generation-0 and Generation-250 yeast strains were revived and samples from  
203 each time point were pooled such that there was no overlap in barcoded yeast strain identity  
204 within each pool. Pools of revived generation-0 and generation-250 yeast were independently  
205 combined in equal proportion (50 pooled-yeast : 50 ancestral reference) with an ancestral  
206 reference strain (re: an ‘unevolved’ barcoded yeast strain); these pooled samples were then  
207 diluted into fresh medium to initialize the fitness assays. Four replicate Fitness assays were  
208 conducted for each pool of generation-0 and generation-250 yeast. Fitness assays employed a  
209 standard 1:1000 transfer dilution across all samples. Samples evolved in CM plus additional  
210 stresses were assayed in the same media type that they were evolved in. Diploid yeast were

211 competed against a diploid reference strain (strain ID: d1H10), while haploid yeast were  
212 competed against the haploid version of this same reference (strain ID: h1H10). In these assays,  
213 yeast samples for DNA extraction were obtained from the undiluted initial mixtures (fitness  
214 assay starting material), and, 20 generations later, from the final overnight population cultures  
215 (fitness assay end) to assess fitness of generation-0 and generation-250 yeast strains. See  
216 “Fitness Calculations”, below, for a full description of fitness assay methodology and for  
217 calculations of fitness from fitness assay barcode abundance data. Libraries were constructed  
218 for sequencing as described in the “Library construction and sequencing section”, below.

219

220 **Library construction and sequencing:** Barcode sequencing libraries for the proof-of-concept  
221 fitness assays and all samples from both components of the 250-generation evolution  
222 experiment were constructed by amplification of the MoBY barcodes (Magtanong et al. 2009)  
223 with primers containing Ion Torrent adaptors with indexes to distinguish samples from one  
224 another (Table S3).

225

226 PCR products for library construction were initially generated using 25 cycles and quantified  
227 (Qubit 3.0 Fluorometer, high sensitivity assay kit). These products were subsequently combined  
228 at equimolar concentrations and purified using a Zymo DNA Clean & Concentrator kit (Zymo  
229 Research D4014) to create a single library for sequencing. The extraction and PCR steps were  
230 repeated for samples that did not attain sufficient DNA concentrations.

231

232 DNA libraries were sequenced using an Ion Torrent sequencer (Ion Proton System, Ion Torrent)  
233 at the Genomics Core Facility at Saint Louis University with a customized parameter to assess  
234 polyclonality after 31bp (the start position of the forward Ion Torrent adapter index sequence).  
235 A single sequencing run was used for each pooled library (library 1 – proof-of-concept fitness  
236 assays, library 2 – evolution experiment: evolutionary dynamics samples, Generation-0 fitness  
237 assays, and Generation-250 fitness assays). An additional library was constructed for a set of  
238 samples from library 2 with elevated barcode contamination rates.

239

#### 240 **Sequence data processing & calculations**

241 **Sequence datasets:** Sequence data in FASTQ format were parsed and demultiplexed using  
242 custom scripts in R (See Code and Data Availability statement, below) A total of 142,243,245  
243 raw reads that matched the forward Ion Torrent adapter indices included in our experiment  
244 (omitting reads that matched no forward adapter, polyclonal reads, low quality reads, and  
245 adapter dimer reads) were recovered across the three sequenced libraries. 104,365,740 reads  
246 (73.4%) were retained for analysis that perfectly matched a forward sequencing adapter index  
247 (9-12 bp), reverse sequencing adapter index (9-12 bp) pair, and a MOBY genetic barcode (20  
248 bp) included in the full experimental design.

249

250 **Barcode contamination rate:** The barcoded yeast experimental evolution system has an innate  
251 ability to detect and track barcode contamination that could arise during evolution, over the  
252 course of short-term fitness assays, or during DNA library preparation. Barcode contamination  
253 rate was defined as the mean number of counts mapping to any given barcoded yeast strain

254 included in the full experimental design (sequenced library), but not expected to be present in  
255 the given sample (pair of forward and reverse IonTorrent adapter Indices). Barcode  
256 contamination rates were calculated separately for each unique forward-reverse index pair  
257 included in each sequencing library and are essentially a measure of how much noise an  
258 average contaminating barcode strain contributes to each sample. The barcode contamination  
259 rate of sample (primer pair)  $j$ ,  $B_j$ , was measured as,

260

261 Equation 1.

$$262 \quad B_j = \frac{\frac{1}{m} \sum_{i=1}^m C_i}{T_j}$$

263

264 where  $m$  is the number of barcoded strains that could potentially contribute to barcode  
265 contamination in experiment  $j$  (i.e., the number of unique strain IDs included in the full library,  
266 but not expected in sample  $j$ ),  $C_i$  is the number of barcoded yeast strain counts recovered for  
267 contaminating barcode  $i$ , and  $T_j$  is the total number of counts recovered in sample  $j$  across all  
268 barcoded yeast strains included in the full experimental design.

269

270 Contamination rate summaries are reported, separately, for the proof-of-concept fitness  
271 assays, and the evolution experiment (the latter containing evolutionary dynamics, generation-  
272 0 fitness assay and generation-250 fitness assays samples). For the subset of evolution  
273 experiment samples that were sequenced in two separate libraries, only the replicate with a  
274 lower contamination rate was retained for contamination rate summary reporting and all

275 downstream analyses. In all statistical analyses reported below, contamination rate is initially  
276 included as a potential predictor; it is removed via model reduction if deemed nonsignificant.

277

278 **Fitness calculations:** Fitness was evaluated via sequencing-based assays that involved  
279 competing barcoded yeast strains against a common ancestral reference strain for 2 days (20  
280 generations) at each timepoint in evolution for which fitness metrics were desired. All reported  
281 fitness values for the yeast strains in all fitness assays are relative to the same barcoded  
282 ancestral reference strain (strain ID: d1H10 for diploids; strain ID: h1H10 for haploids). Briefly,  
283 the relative fitness of barcoded yeast strain  $i$  at generation  $gn$ ,  $w_{i gn}$ , was measured as,

284

285 Equation 2.

286

287 
$$w_{i gn} = \left( \left( \ln \frac{C_{i20}}{R_{20}} - \ln \frac{C_{i0}}{R_0} \right) / 20 \right)^e$$

288

289 where  $C_i$  and  $R$  refer to barcode counts for the focal barcode and reference barcode at fitness  
290 assay generation 0 (initial mixtures; fitness assay initial measurement) and fitness assay  
291 generation 20 (final overnight cultures; fitness assay final measurement), and 20 is the number  
292 of generations between measurement at fitness assay generation 0 and fitness assay  
293 generation 20 (Hartl and Clark 1997). The change in fitness of strain  $i$  in the endpoint assays for  
294 our 250-generation evolution experiment,  $\Delta w_i$ , we therefore computed as,

295

296 Equation 3.

297 
$$\Delta w_i = w_{i_{g250}} - w_{i_{g0}},$$

298

299 where  $w_{i_{g0}}$  and  $w_{i_{g250}}$  are the strain's fitness at generation 0 and 250 as measured from  
300 Equation 2.

301

302

### 303 **Statistical analysis**

304 **Analysis & visualization tools:** All Analyses and statistical test were conducted in R version 3.5.2  
305 (R Core Team 2012) using the RStudio IDE version 1.1.456 (RStudio Team 2016). Data  
306 processing uses almost entirely base-R functionality; the plyr package (Hadley Wickham 2011) is  
307 used in some cases for data frame manipulation. All Statistical models with linear mixed effects  
308 were generated using the lme4 (Bates et al. 2015), and lmerTest (Kuznetsova, Brockhoff, and  
309 Christensen 2017) packages. Weighted t-tests were assessed with the weights package (Pasek  
310 2018). Finally, figures and tables were generated with the ggplot2 (Wickham 2009) and sjPlot  
311 (Ludecke 2019) packages, respectively; multi-panel figures were built using the gridExtra  
312 package (Auguie 2017). Raw p-values are reported unless otherwise noted; the tables included  
313 in the supplement report raw and corrected p-values for these instances.

314

315 **Reads:** Analysis of multiplex barcode sequencing data requires careful consideration of sample  
316 size. Because counts data are ultimately handled as relative frequencies (proportions), it was  
317 necessary to consider underlying sample size or “confidence” in each piece of data within the  
318 full dataset for all calculations and analyses. That is, entries with more reads were explicitly



319 assumed to contribute more to summary calculations and statistical analyses. Variation in  
320 sample size was thus controlled for by weighting all calculations by the read sample size and by  
321 including such weights in downstream statistical models. This sample size metric considers both  
322 the total counts recovered for a multiplexed sample (unique forward and reverse index  
323 sequence adapter pair) and the number of counts recovered for the focal barcoded yeast  
324 strain(s) for that entry. In the analyses presented here, read calculations utilize harmonic means  
325 rather than arithmetic means when data for multiple entries was summarized. Harmonic means  
326 were used because they are sensitive to the small values that were typically associated with low  
327 focal barcoded strain reads in the dataset.

328

329 **Proof-of-concept fitness assays:** Fitness differences among 92 constructed barcoded yeast  
330 strains used for proof-of-concept were assessed using a linear model with mean-corrected  
331 fitness as the response variable and yeast strain ID as the predictor variable.

332

333 **Multiplex barcode sequencing and cross-contamination:** Barcode contamination rate was  
334 assessed (Equation 2.) and summarized, separately for the proof-of-concept fitness assay and  
335 the 250-generation experiment. The effects of barcode contamination rate change in fitness  
336 were assessed using a linear mixed effects model with barcode cross-contamination rate as the  
337 predictor variable and change in fitness as the response variable. Strain identifier (evolutionary  
338 treatment plus yeast strain barcode ID) was included as a random effect nested within  
339 evolutionary treatment and was applied only to the intercepts for these models. Additionally, a  
340 weighted 1-tailed t-test was utilized to assess whether barcode cross-contamination rates for

341 samples collected in either the fitness assay or the evolution experiment decreased after re-  
342 extracting DNA and resequencing.

343

344 **Fitness change in 250 generations of experimental evolution:** Barcoded yeast strains that  
345 exhibited increases in fitness over the 250-generation fitness experiment were identified using  
346 a linear model with change in fitness as the response variable and a strain identifier (treatment  
347 plus yeast strain Barcode ID) as the predictor variable.

348

349 The effects of evolutionary treatment (medium type, ploidy, and transfer dilution) on change in  
350 fitness over 250 generations of experimental evolution were assessed using a linear mixed  
351 effects model with change in fitness ( $\Delta w$ ) as the response variable, and treatment and barcode  
352 cross-contamination rate as predictor variables. Additionally, a random effect of a strain  
353 identifier (treatment plus yeast strain Barcode ID) was placed on the model intercept.

354

355 **Evolutionary dynamics:** For all analyses of evolutionary dynamics, only the first barcoded yeast  
356 strain from each well (sympatric pair) was included to ensure that data were not 'double-  
357 counted'. Linear models, with treatment as the predictor variable and either (1) t-max, (2) m-  
358 max, (3) t-max-rate, (4) m-max-rate, (5) t-max-diff, (6) m-max-diff, or (7) total cumulative  
359 change in barcoded relative abundance across all time-points as the dependent variable were  
360 employed to assess treatment differences in evolutionary dynamics. Full models also included  
361 initial barcode abundance as a predictor term (in addition to contamination rate) because initial  
362 barcode abundance could impact subsequent dynamics. Initial barcode abundance was

363 subsequently removed from models when nonsignificant, resulting in removal from all but one  
364 model (t-max-diff). Barcode fixation rate was not assessed statistically due to the small number  
365 of fixation events observed (n=7/76 populations).

366

### 367 **Code & data availability**

368 Raw sequence data are available from NCBI's Sequence Read Archive (SRA BioProject ID  
369 PRJNA555990). Data formatted for analysis, intermediate data frames, as well as the custom R  
370 scripts utilized for all data processing, statistical analysis, and figure generation are available  
371 from GitHub ([github.com/VinceFasanello/MM\\_Code\\_Supplement](https://github.com/VinceFasanello/MM_Code_Supplement)). A readme file is available in  
372 the GitHub repository with the instructions necessary to reproduce the analyses and to confirm  
373 the results presented in this article. Supplementary figures, tables, and files are described  
374 throughout the main text; detailed descriptions of all supplemental files can be found in File S1.  
375 Strains are available upon request.

376

## 377 **RESULTS**

378

### 379 **Proof-of-concept fitness assays**

380 We constructed 92 diploid yeast strains, each with a unique 20 bp barcode inserted upstream  
381 of the deleted *HO* gene. We conducted Proof-of-Concept fitness assays to measure any fitness  
382 differences among these constructed "barcoded" strains, to estimate our power to detect small  
383 fitness differences, and to assess our ability to measure fitness using multiplexed barcode  
384 sequencing. We measured fitness simultaneously for our pool of 92 barcodes by the change in

385 barcode abundance relative to a 'reference' strain (barcode ID: d1H10) in 10 replicates over a  
386 two-day period of approximately 20 generations, for a total of 920 fitness assays (92 barcodes x  
387 10 replicates).

388

389 A few of the barcoded strains showed significant differences in fitness (3/92 at a 5% FDR, 1/92  
390 at a 1% FDR) (Figure 2, Table S4). The root mean squared error (rMSE) among replicated  
391 measures of fitness was 0.0176, indicating good power to detect a 2% fitness difference at  
392 nominal significance of 0.05 and a 5% fitness difference at a more stringent cutoff of 0.01 with  
393 four replicates (Table S5). With these promising results, we proceeded to conduct a more  
394 comprehensive test of the utility of barcoded strains in a practical experimental evolution  
395 context.

396

### 397 **Experimental evolution**

398 To evaluate the strengths of this barcoded-strain system for studies of experimental evolution,  
399 we conducted a 25 day, approximately 250 generation, evolution experiment. Our design  
400 included 76 populations, each initiated with two sympatric barcodes. Samples spanned six  
401 treatments, which varied in yeast strain ploidy, growth medium, and daily transfer dilution  
402 (Table S2). To measure any changes in fitness we competed the evolved generation-250 strains  
403 and their generation-0 ancestors against a common reference strain over a two-day period of  
404 approximately 20 generations. With four replicate fitness assays for each barcode, this  
405 amounted to 1,216 fitness assays (2 barcodes \* 2 time-points \* 76 populations \* 4 replicates).  
406 We also measured the change in barcode frequency of sympatric barcoded strains within each

407 evolving population from 532 longitudinal-evolutionary dynamics samples (76 barcoded pairs \*  
408 7 timepoints). From these samples we quantified the magnitude and timing of changes in  
409 barcode frequency, which should be influenced by changes in the fitness of the evolving,  
410 sympatric barcoded strains present within each population.

411

412 **Multiplex barcode sequencing:** We utilized a two-step multiplexed design to obtain high  
413 throughput estimates of fitness based on barcode sequencing in our fitness assays. In the first  
414 step we leveraged the strain-identifying barcodes by pooling multiple strains together and  
415 simultaneously competing them against an ancestral reference strain to estimate relative  
416 fitness. In our second multiplexing step we PCR amplified each fitness assay sample with unique  
417 forward and reverse indexed sequencing adaptors. This latter step enabled us to assign  
418 sequencing reads to the appropriate fitness assay after sequencing many samples in concert as  
419 a single library. We constructed one library for each experiment (Library 1 – Proof-of-Concept  
420 fitness assays; Library 2 – 250-generation evolution experiment evolutionary dynamics and  
421 fitness assays samples).

422

423 From 84,776,627 demultiplexed reads, we obtained a median of 2,961 reads per barcode in  
424 each sample. However, we also detected cross-contamination, defined as strain barcodes with  
425 sample indexes that shouldn't exist in our sequenced libraries. The average rate of cross  
426 contamination per sample was low, 0.04%, and consistently present in nearly all of our samples  
427 (Figure S1 A, B.). Contamination could occur during culturing of yeast strains, liquid handling  
428 during preparation of libraries (Lenski et al. 1991; Van den Bergh et al. 2018), or via index

429 switching during sequencing procedures (Illumina 2017; Sinha et al. 2017; Costello et al. 2018).  
430 The low but uniform rate of cross contamination we observe is more consistent with library  
431 preparation and sequencing than yeast contamination. Additionally, no growth was observed in  
432 culture blanks during any fitness assays nor during the 25-day experimental evolution  
433 experiment.  
434  
435 To test whether the cross-contamination rate depends on liquid handling during library  
436 preparation, we reprocessed a subset of samples with high cross contamination rates using  
437 identical starting material (multiple sample aliquots were created at the time of sample  
438 collection). Cross contamination rates decreased significantly in these reprocessed samples ( $t =$   
439 22.3,  $df = 65$ ,  $p < 10e-6$ ), but a low level of background contamination remained (Original  
440 Samples: mean = 0.75%; reprocessed samples: mean = 0.05%) (Figure S2).  
441  
442 In our analyses, the presence of low abundance cross contamination was removed from all  
443 samples in which a barcode is not expected to occur. However, this doesn't eliminate  
444 contamination in samples where a barcode is expected to occur. In such cases, error in  
445 estimates of barcode frequency is highest when a barcode's frequency is low and approaches  
446 the cross-contamination rate. Although results did not greatly change using cross-  
447 contamination as a covariate, we included cross-contamination rate in our models (when  
448 significant) because it was negatively associated with fitness ( $P < 10e-6$ ) between generation 0  
449 and generation 250 in the fitness assays data from the 250-generation experimental evolution  
450 (Figure S3; Table S6).

451

452 **End-point fitness assays:** We assessed fitness in the 154 evolved strains (evolution experiment  
453 generation-250 strains) as well as their ancestors (evolution experiment generation-0 strains).  
454 For each strain and timepoint, fitness was measured in comparison to a common ancestral  
455 reference strain via a two-day competition-based fitness assay in the same conditions under  
456 which the strain had been evolved.

457

458 Twenty three percent (35/154) of the strains showed significant increases in fitness between  
459 generation 0 and generation 250 at a 1% FDR (Figure 3, Table S7). Within this subset, the  
460 average fitness increase was 6.80% with a range of 2.75% to 23.5%. Relatively few strains with  
461 significant increases in fitness were found in the CM treatment (3/42; 7.14%) and ethanol stress  
462 treatment (2/22; 9.09%). A higher proportion of strains exhibited significant increases in fitness  
463 in the lower 1:250 dilution treatment (9/22; 40.9%), the salt stress treatment (11/22; 50.0%),  
464 and the haploid treatment (10/22; 45.5%). No strains in the 1:4000 dilution treatment (0/22)  
465 exhibited increases in fitness. None of strains (0/154) across all of our treatments exhibited a  
466 significant overall decrease in fitness in the course of our experiments.

467

468 Next, we evaluated the effect of evolutionary treatment on fitness change. We found  
469 significant variation in fitness among treatments ( $P < 10e-6$ ). Relative to our standard culture  
470 conditions -- diploids in CM ("no stress") with 1:1000 transfer dilution, we found greater (more  
471 positive) fitness change in diploid strains evolved in salt stress ( $P < 10e-6$ ), in haploid strains  
472 evolved in standard culture conditions ( $p = 1.13e-2$ ), and in diploid strains evolved with a

473 reduced (1:250) daily transfer dilution ( $p = 9.49e-4$ ). Relative to the CM (“no stress”) diploid  
474 treatment (our standard culture conditions), we found less (less positive) fitness change in  
475 diploid strains evolved in ethanol stress ( $p = 3.99e-3$ ). We found no significant effect of a more  
476 extreme daily transfer dilution (1:4000) on fitness change ( $p=0.39$ ). Contamination rate had a  
477 significantly negative effect on fitness ( $P < 10e-6$ ) (Figure 4, Table S8), which is consistent with  
478 the idea that cross-contamination can reduce the power to detect fitness differences.

479

480 **Evolutionary dynamics:** In experimental evolution, adaptation can influence the relative  
481 abundance of barcodes evolving in sympatry (Kao and Sherlock 2008; Selmecki et al. 2015). We  
482 tracked the relative proportions of 76 barcoded-yeast pairs evolving in sympatry at seven  
483 timepoints during our 250-generation evolution experiment (days 0, 10, 15, 20, 22, 24, and 25)  
484 to examine the evolutionary dynamics generated by adaptation and other processes (e.g.,  
485 drift). We collected 8 measurements from these 532 evolutionary dynamics samples (76  
486 populations \* 7 timepoints): (1) barcode fixation, (2) the time-point and (3) magnitude of the  
487 maximum change in relative abundance in comparison to the starting conditions, (4) the time-  
488 point and (5) magnitude of the maximum rate of change between adjacent time-points, (6) the  
489 time-point and (7) magnitude of the maximum difference in BC proportions, and (8) the total  
490 cumulative change in barcoded relative abundance summed across all time-points.

491

492 Out of the seven measures of adaptive dynamics that were amenable to statistical testing, six  
493 significantly differed by treatment (Table 1; see supplemental figures S4:S10 and supplemental  
494 tables S9:S15 for individual adaptive dynamics plots and results tables). Relative to the CM-



495 diploid treatment (our standard culture conditions) both the salt and haploid treatments were  
496 associated with a larger maximum change in relative abundance in comparison to the start ( $p =$   
497  $5.24e-5$ ,  $p = 5.85e-3$ , respectively) and a more extreme maximum difference in BC proportion ( $p$   
498  $= 2.77e-4$ ,  $p = 6.01e-6$ , respectively). The salt treatment was also associated with an earlier  
499 time-point of the maximum change in abundance relative to the start ( $p = 0.01$ ), and the  
500 haploid treatment was associated with an earlier maximum rate of change ( $p = 1.35e-5$ ). The  
501 total cumulative change in barcode abundance was greater for the 1:4000 dilution treatment  
502 than the 1:1000 dilution treatment ( $p = 1.77e-3$ ). Total cumulative change in barcode  
503 abundance was significantly less for haploids than diploids ( $p = 4.9e-2$ ), and significantly less in  
504 the ethanol stress treatment than in the CM with no stress treatment ( $p = 2.98e-2$ ). Finally, we  
505 observed barcodes that approached fixation in eleven percent (9/76) of our sympatric  
506 populations. Most near-fixation events were in the sympatric populations from the salt (3/11;  
507 27.3%) and haploid (5/11; 45.5%) treatments, one instance was observed in the CM-diploid  
508 treatment and no instances of near-fixation were observed in the ethanol 1:4000 dilution, nor  
509 1:250 dilution treatments.

510

## 511 DISCUSSION

512

513 Experimental evolution has proven to be a valuable approach for studying a range of  
514 evolutionary questions. In this study we implemented a genetic barcoding system in *S.*  
515 *cerevisiae* to increase the efficiency and throughput of these types of studies. The premise of  
516 our system is that barcoding microbial strains allows us to engage in increasingly complex

517 experimental designs by enabling multiplexing of independent samples, which increases the  
518 throughput of fitness assays, and by providing a relatively simple means to track barcode  
519 lineage dynamics. Accordingly, we have demonstrated our system's potential for detecting  
520 fitness differences in six experimental evolution treatments and have shown that while the  
521 typically low levels of barcode cross-contamination we observe cannot be completely  
522 eliminated, their effects on inference can be minimized through simple statistical procedures.  
523 Below we discuss the merits and drawbacks of our system, and its capabilities to increase  
524 efficiency and throughput in experimental evolution research.

525  
526 One potential caveat of a barcoding system like the one we propose here, is that barcoded  
527 strains are not necessarily identical to one another at the beginning of an experiment even if all  
528 barcoded variants are produced from a single ancestral clone. Although we found no significant  
529 fitness differences among the majority of barcoded strains, we note that we did indeed observe  
530 a few strains with significant deviations from the population mean fitness. Given the location of  
531 our barcode insertions (i.e., a currently non-functional region of the genome) it is unlikely that  
532 the barcodes themselves generated these fitness differences. A perhaps more likely explanation  
533 is that these differences arose from mutations that occurred during transformation (Giaever  
534 and Nislow 2014) or shortly thereafter. Regardless of the reason, future users of our  
535 experimental approach could either remove strains with fitness differences entirely from their  
536 analyses or could instead quantify initial fitness differentials and include them as a covariate in  
537 downstream analyses or fitness assays. We note that initial fitness differentials may be of  
538 interest themselves, given that they can potentially impact evolutionary outcomes (Barrick et

539 al. 2010; Kryazhimskiy et al. 2014; Jerison et al. 2017) and the types of mutations that  
540 successfully spread through an experimental population (MacLean, Perron, and Gardner 2010).  
541  
542 An ideal experimental evolution system must be able to detect changes in fitness with  
543 confidence. Studies are typically designed to carefully measure large fitness effects; these  
544 studies commonly report significant fitness changes or advantages in the range of 5-25% (De  
545 Visser and Rozen 2006; B. S. Hughes, Cullum, and Bennett 2007; Gresham et al. 2008; R. Dhar et  
546 al. 2011; Selmecki et al. 2015). (De Visser and Rozen 2006)(B. S. Hughes, Cullum, and Bennett  
547 2007)(Gresham et al. 2008)(R. Dhar et al. 2011)(Selmecki et al. 2015)Some studies are able to  
548 detect fitness effects of ~2%; these typically rely on a large amount of replication and/or  
549 sequencing-based census techniques to detect small effect sizes. We show that our  
550 experimental evolution system can detect fitness effects of 2% with high power using a  
551 relatively small number of replicates ( $n = 4$ ). The high-throughput nature of this system makes it  
552 amenable for studies in which either expected fitness changes are small or replication is  
553 difficult due to complex experimental designs that require assaying fitness in multiple contexts;  
554 the system is particularly advantageous when many strains (tens to hundreds) are included in  
555 each treatment.  
556  
557 Another important consideration when designing an experimental evolution system is that it  
558 must be fairly robust to contamination. While culture contamination is rare in experimental  
559 evolution (Lenski et al. 1991; T. F. Cooper and Lenski 2010), barcode (or cross-), contamination  
560 is possible. Our results are consistent with prior work on this topic. Specifically, while we found

561 no evidence of culture contamination in blank cultures, we detected a uniformly low level of  
562 barcode contamination in multiplexed fitness assays and evolutionary dynamics samples.  
563 Because there was no conspicuous pattern of cross-contamination, we suggest that the  
564 observed contamination was likely to be introduced in our system during sample preparation  
565 for DNA sequencing. DNA extraction is a likely source of cross-contamination in samples  
566 processed in strip-tubes or 96-well plate formats that prioritize throughput. However, we  
567 minimized the chance for contamination in the DNA isolation step in our experiments by  
568 isolating DNA with individual reaction tubes for each sample. Still, other sources of  
569 contamination are possible, these include primer contamination during the index addition via  
570 PCR (Lo, Mehal, and Fleming 1988) and index switching during library construction or  
571 sequencing (Illumina 2017; Sinha et al. 2017; Costello et al. 2018). The latter possibility seems  
572 nevertheless unlikely because all PCR steps were performed separately prior to pooling of  
573 libraries.

574

575 The strength and efficiency of our system is further evidenced by its numbers. A barcode  
576 system enabled us to evolve a large number of strains (176) for 250 generations across six  
577 treatments, and to conduct a total of 532 evolutionary dynamics measurements and 1,216  
578 fitness assays related to these manipulations in a relatively short amount of time. Reassuringly,  
579 our results are largely consistent with prior work. We find greater fitness increases, i.e., a  
580 greater rate of adaptation, in haploids than diploids. This finding agrees with another study that  
581 found faster rates of adaptation and larger effective population sizes in haploids relative to  
582 diploids (A. C. Gerstein et al. 2011). In a related study, Selmecki et al., (Selmecki et al. 2015)

583 found faster adaptation in tetraploids than diploids, but no difference in rate of adaptation  
584 between haploids and diploids, potentially suggesting a trend opposite to ours of increasing  
585 adaptive rate with increasing ploidy. However, differences between haploids and diploids must  
586 be treated with caution because there is mounting evidence that haploid yeast evolves towards  
587 diploidy under experimental evolution conditions (Aleeza C. Gerstein and Otto 2011; R. Dhar et  
588 al. 2011; Selmecki et al. 2015). We also find greater fitness increase in complete medium (CM)  
589 plus NaCl stress than in CM alone, which was not surprising given what is known about  
590 adaptation to NaCl stress in *S. cerevisiae* (Blomberg 1995; R. Dhar et al. 2011; Park, Yang, and  
591 Kim 2015; Tekarslan-Sahin, Alkim, and Sezgin 2018). In contrast, we were surprised to detect  
592 less fitness increase in CM plus EtOH stress than in CM alone. There are several non-mutually  
593 exclusive explanations for this result: It is possible that ethanol did not present a significant  
594 stress (selective pressure) to the cells once they had attained physiological adaptation to the  
595 medium, i.e., acclimation (Huang et al. 2018). It is also possible that adaptations to CM and  
596 adaptations to ethanol exhibit antagonistic pleiotropy, similar to what has been found in  
597 experiments contrasting rich and poor media (Minty et al. 2011) or exploring adaptation to  
598 other chemical stressors (Reyes, Abdelaal, and Kao 2013). Pleiotropy could also shed light on  
599 the marked adaptation observed in the NaCl treatment given that adaptation to CM and NaCl  
600 stress may exhibit complementarity via synergistic or positive pleiotropy (Ostman, Hintze, and  
601 Adami 2012; Riddhiman Dhar et al. 2013; McGee et al. 2016; K. A. Hughes and Leips 2017).  
602 Finally, we find no difference between the 1:1000 and 1:4000 daily dilution treatments, but we  
603 find a greater increase in fitness when a 1:250 transfer dilution was used instead of the  
604 standard 1:1000 dilution. While this finding is not necessarily expected (Gerrish and Lenski

605 1998; De Visser et al. 1999; De Visser and Rozen 2006; Kryazhimskiy, Rice, and Desai 2012), it  
606 nevertheless supports earlier findings that less extreme bottlenecks may favor the maintenance  
607 of adaptive mutants (Wahl, Gerrish, and Saika-Voivod 2002), and is consistent with evidence for  
608 greater mean fitness increase in wide vs. narrow bottleneck populations (Schoustra et al. 2009).  
609 It is also consistent with earlier observations that large populations are less adaptively  
610 constrained than small ones in simple environments (Rozen et al. 2008).

611

612 In addition to high-throughput fitness assays, barcoding enabled us to track sympatric barcoded  
613 lineages during the course of experimental evolution (Blundell and Levy 2014; Levy et al. 2015;  
614 V. S. Cooper 2018). As expected, we found general agreement between the evolutionary  
615 dynamics results and endpoint fitness assay results in our six experimental treatments. For  
616 example, the haploid and NaCl stress treatments both displayed dynamics consistent with more  
617 extreme increases in fitness, including greater change in barcode abundance relative to the  
618 starting conditions and a greater maximum difference in sympatric barcode abundance than  
619 diploids in CM. Interestingly, haploids also showed signs of earlier adaptation than diploid  
620 strains in similar conditions, as evidenced by an earlier generation of maximum rate of change  
621 in barcode abundance (Blundell and Levy 2014; Levy et al. 2015; Selmecki et al. 2015) and a  
622 lower total change in barcode abundance over 250 generations. Although this latter result  
623 seem paradoxical, it is consistent with the observation that haploids adapt earlier than diploid  
624 strains (A. C. Gerstein et al. 2011), and is expected if a greater proportion of the total change in  
625 barcode abundance of haploids in our experiments happened in the first 100 generations.

626

627 Despite significant differences in barcode dynamics, there are some limitations to interpreting  
628 these results. Because we mostly assessed abundance every 50 generations, it is possible that  
629 we missed some of the adaptive dynamics. Furthermore, barcode frequencies over time were  
630 not measured in replicate. Finally, changes in barcode abundance may not be related to final  
631 fitness. For example, the 1:4000 transfer dilution bottleneck treatment had elevated rates of  
632 change in barcode abundance and a high amount of total change in barcode abundance  
633 without a concomitant increase in fitness. We therefore suggest that future studies employ a  
634 denser and more even longitudinal-evolutionary dynamics sampling scheme, with replication,  
635 to maximize the value of this type of lineage tracking data.

636

637 In summary, we conclude that the barcoded yeast system that we describe here greatly  
638 increases the throughput of fitness measurements and provides a relatively simple means for  
639 lineage tracking, thereby enabling more complex and potentially more useful experimental  
640 evolution designs. We observe that although barcode contamination imposes some limitations  
641 on the implementation of this system, it is possible to track the origin and rates of such  
642 contamination and, therefore, consider its effects on experimental outcomes. Overall, our  
643 findings indicate that this system represents a significant step forward toward the design and  
644 implementation of high throughput studies in this field.

645  
646  
647  
648  
649  
650  
651  
652  
653  
654  
655  
656  
657  
658  
659  
660  
661  
662  
663  
664  
665  
666

## REFERENCES

- Auguie, Baptiste. 2017. "GridExtra: Miscellaneous Functions for 'Grid' Graphics."
- Bailey, Susan F., François Blanquart, Thomas Bataillon, and Rees Kassen. 2017. "What Drives Parallel Evolution?: How Population Size and Mutational Variation Contribute to Repeated Evolution." *BioEssays* 39 (1): 1–9. <https://doi.org/10.1002/bies.201600176>.
- Bailey, Susan F., Qianyun Guo, and Thomas Bataillon. 2018. "Identifying Drivers of Parallel Evolution: A Regression Model Approach." *Genome Biology and Evolution* 10 (10): 2801–12. <https://doi.org/10.1093/gbe/evy210>.
- Barrick, Jeffrey E., Mark R. Kauth, Christopher C. Streliaoff, and Richard E. Lenski. 2010. "Escherichia Coli RpoB Mutants Have Increased Evolvability in Proportion to Their Fitness Defects." *Molecular Biology and Evolution* 27 (6): 1338–47. <https://doi.org/10.1093/molbev/msq024>.
- Bates, Douglas, Martin Mächler, Ben Bolker, and Steve Walker. 2015. "Fitting Linear Mixed-Effects Models Using Lme4." *Journal of Statistical Software* 67 (1). <https://doi.org/10.18637/jss.v067.i01>.
- Bell, Graham, and Andrew Gonzalez. 2011. "Adaptation and Evolutionary Rescue Environmental Deterioration." *Science* 332 (June): 1327–30. <https://doi.org/10.1126/science.1203105>.
- Bergh, Bram Van den, Toon Swings, Maarten Fauvart, and Jan Michiels. 2018. "Experimental Design, Population Dynamics, and Diversity in Microbial Experimental Evolution." *Microbiology and Molecular Biology Reviews* 82 (3): e00008-18. <https://doi.org/10.1128/mmbbr.00008-18>.



- 667 Blomberg, A. 1995. "Global Changes in Protein Synthesis during Adaptation of the Yeast  
668 *Saccharomyces Cerevisiae* to 0.7 M NaCl." *Journal of Bacteriology* 177 (12): 3563–72.  
669 <https://doi.org/10.1128/jb.177.12.3563-3572.1995>.
- 670 Blundell, Jamie R., and Sasha F. Levy. 2014. "Beyond Genome Sequencing: Lineage Tracking  
671 with Barcodes to Study the Dynamics of Evolution, Infection, and Cancer." *Genomics* 104  
672 (6): 417–30. <https://doi.org/10.1016/j.ygeno.2014.09.005>.
- 673 Burke, Molly K., Gianni Liti, and Anthony D. Long. 2014. "Standing Genetic Variation Drives  
674 Repeatable Experimental Evolution in Outcrossing Populations of *Saccharomyces*  
675 *Cerevisiae*." *Molecular Biology and Evolution* 31 (12): 3228–39.  
676 <https://doi.org/10.1093/molbev/msu256>.
- 677 Cooper, Tim F, and Richard E Lenski. 2010. "Experimental Evolution with *E. Coli* in Diverse  
678 Resource Environments. I. Fluctuating Environments Promote Divergence of Replicate  
679 Populations." *BMC Evolutionary Biology* 10 (11).
- 680 Cooper, Vaughn S. 2018. "Experimental Evolution as a High-Throughput Screen for Genetic  
681 Adaptations." *MSphere* 3 (3): 1–7. <https://doi.org/10.1128/msphere.00121-18>.
- 682 Costello, Maura, Mark Fleharty, Justin Abreu, Yossi Farjoun, Steven Ferriera, Laurie Holmes,  
683 Brian Granger, et al. 2018. "Characterization and Remediation of Sample Index Swaps by  
684 Non-Redundant Dual Indexing on Massively Parallel Sequencing Platforms." *BMC*  
685 *Genomics* 19 (1): 1–10. <https://doi.org/10.1186/s12864-018-4703-0>.
- 686 Dhar, R., R. Sägesser, C. Weikert, J. Yuan, and A. Wagner. 2011. "Adaptation of *Saccharomyces*  
687 *Cerevisiae* to Saline Stress through Laboratory Evolution." *Journal of Evolutionary Biology*  
688 24 (5): 1135–53. <https://doi.org/10.1111/j.1420-9101.2011.02249.x>.

- 689 Dhar, Riddhiman, Rudolf Sägesser, Christian Weikert, and Andreas Wagner. 2013. “Yeast Adapts  
690 to a Changing Stressful Environment by Evolving Cross-Protection and Anticipatory Gene  
691 Regulation.” *Molecular Biology and Evolution* 30 (3): 573–88.  
692 <https://doi.org/10.1093/molbev/mss253>.
- 693 Garland, Theodore, and Michael R. Rose. 2009. *Experimental Evolution Concepts, Methods, and*  
694 *Applications of Selection Experiments*. University of California Press.
- 695 Gerrish, Philip J., and Richard E. Lenski. 1998. “The Fate of Competing Beneficial Mutations in an  
696 Asexual Population.” *Genetica* 102 (107): 127–44. [https://doi.org/10.1007/978-94-011-](https://doi.org/10.1007/978-94-011-5210-5_12)  
697 [5210-5\\_12](https://doi.org/10.1007/978-94-011-5210-5_12).
- 698 Gerstein, A. C., L. A. Cleathero, M. A. Mandegar, and S. P. Otto. 2011. “Haploids Adapt Faster  
699 than Diploids across a Range of Environments.” *Journal of Evolutionary Biology* 24 (3):  
700 531–40. <https://doi.org/10.1111/j.1420-9101.2010.02188.x>.
- 701 Gerstein, Aleeza C., and Sarah P. Otto. 2011. “Cryptic Fitness Advantage: Diploids Invade  
702 Haploid Populations despite Lacking Any Apparent Advantage as Measured by Standard  
703 Fitness Assays.” *PLoS ONE* 6 (12). <https://doi.org/10.1371/journal.pone.0026599>.
- 704 Giaever, Guri, and Corey Nislow. 2014. “The Yeast Deletion Collection: A Decade of Functional  
705 Genomics.” *Genetics* 197 (2): 451–65. <https://doi.org/10.1534/genetics.114.161620>.
- 706 Graves, J. L., K. L. Hertweck, M. A. Phillips, M. V. Han, L. G. Cabral, T. T. Barter, L. F. Greer, et al.  
707 2017. “Genomics of Parallel Experimental Evolution in *Drosophila*.” *Molecular Biology and*  
708 *Evolution* 34 (4): 831–42. <https://doi.org/10.1093/molbev/msw282>.
- 709 Gresham, David, Michael M. Desai, Cheryl M. Tucker, Harry T. Jenq, Dave A. Pai, Alexandra  
710 Ward, Christopher G. DeSevo, David Botstein, and Maitreya J. Dunham. 2008. “The

- 711 Repertoire and Dynamics of Evolutionary Adaptations to Controlled Nutrient-Limited  
712 Environments in Yeast.” *PLoS Genetics* 4 (12).  
713 <https://doi.org/10.1371/journal.pgen.1000303>.
- 714 Hadley Wickham. 2011. “The Split-Apply-Combine Strategy for Data Analysis.” *Journal of*  
715 *Statistical Software* 40 (1): 1–29. <https://doi.org/10.1234/2013/999990>.
- 716 Hartl, Daniel L., and Andrew G. Clark. 1997. *Principles of Population Genetics*. Vol. 116.  
717 Sunderland, MA: Sinauer associates.
- 718 Horinouchi, Takaaki, Shingo Suzuki, Takashi Hirasawa, Naoaki Ono, Tetsuya Yomo, Hiroshi  
719 Shimizu, and Chikara Furusawa. 2015. “Phenotypic Convergence in Bacterial Adaptive  
720 Evolution to Ethanol Stress.” *BMC Evolutionary Biology* 15 (1): 1–14.  
721 <https://doi.org/10.1186/s12862-015-0454-6>.
- 722 Huang, Chih Jen, Mei Yeh Lu, Ya Wen Chang, and Wen Hsiung Li. 2018. “Experimental Evolution  
723 of Yeast for High-Temperature Tolerance.” *Molecular Biology and Evolution* 35 (8): 1823–  
724 39. <https://doi.org/10.1093/molbev/msy077>.
- 725 Hughes, Bradley S., Alistair J. Cullum, and Albert F. Bennett. 2007. “Evolutionary Adaptation to  
726 Environmental PH in Experimental Lineages of Escherichia Coli.” *Evolution* 61 (7): 1725–34.  
727 <https://doi.org/10.1111/j.1558-5646.2007.00139.x>.
- 728 Hughes, Kimberly A., and Jeff Leips. 2017. “Pleiotropy, Constraint, and Modularity in the  
729 Evolution of Life Histories: Insights from Genomic Analyses.” *Annals of the New York*  
730 *Academy of Sciences* 1389 (1): 76–91. <https://doi.org/10.1111/nyas.13256>.
- 731 Huxley, Clare, Eric D. Green, and Ian Dunbam. 1990. “Rapid Assessment of *S. Cerevisiae* Mating  
732 Type by PCR.” *Trends in Genetics* 6 (C): 236. [https://doi.org/10.1016/0168-9525\(90\)90190-](https://doi.org/10.1016/0168-9525(90)90190-)

- 733 H.
- 734 Illumina. 2017. "Effects of Index Misassignment on Multiplexing and Downstream Analysis."  
735 *Illumina*, 1–4. <https://doi.org/10.1101/125724>.
- 736 Jerison, Elizabeth R., Sergey Kryazhimskiy, James Kameron Mitchell, Joshua S. Bloom, Leonid  
737 Kruglyak, and Michael M. Desai. 2017. "Genetic Variation in Adaptability and Pleiotropy in  
738 Budding Yeast." *ELife* 6. <https://doi.org/10.7554/eLife.27167>.
- 739 Kao, Katy C., and Gavin Sherlock. 2008. "Molecular Characterization of Clonal Interference  
740 during Adaptive Evolution in Asexual Populations of *Saccharomyces Cerevisiae*." *Nature*  
741 *Genetics* 40 (12): 1499–1504. <https://doi.org/10.1038/ng.280>.
- 742 Kassen, Rees. 2014. *Experimental Evolution and the Nature of Biodiversity*. Greenwood Village,  
743 CO USA: Roberts and Company publishers, Inc.
- 744 Kohn, Linda M., and James B. Anderson. 2014. "The Underlying Structure of Adaptation under  
745 Strong Selection in 12 Experimental Yeast Populations." *Eukaryotic Cell* 13 (9): 1200–1206.  
746 <https://doi.org/10.1128/EC.00122-14>.
- 747 Kryazhimskiy, Sergey, Daniel P. Rice, and Michael M. Desai. 2012. "Population Subdivision and  
748 Adaptation in Asexual Populations of *Saccharomyces Cerevisiae*." *Evolution* 66 (6): 1931–  
749 41. <https://doi.org/10.1111/j.1558-5646.2011.01569.x>.
- 750 Kryazhimskiy, Sergey, Daniel P Rice, Elizabeth R Jerison, and Michael M Desai. 2014. "Global  
751 Epistasis Makes Adaptation Predictable Despite Sequence-Level Stochasticity." *Science* 344  
752 (6191): 1519–22.
- 753 Kuznetsova, Alexandra, Per B. Brockhoff, and Rune H. B. Christensen. 2017. "lmerTest Package:  
754 Tests in Linear Mixed Effects Models ." *Journal of Statistical Software* 82 (13).

- 755 <https://doi.org/10.18637/jss.v082.i13>.
- 756 Lenski, Richard E., Michael R. Rose, Suzanne C. Simpson, and Scott C. Tadler. 1991. "Long-Term  
757 Experimental Evolution in Escherichia Coli. I. Adaptation and Divergence During 2,000  
758 Generations." *The American Naturalist* 138 (6): 1315–41. <https://doi.org/10.1086/285289>.
- 759 Lenski, Richard E, PD Sniegowski, and PJ Gerrish. 1997. "Evolution of High Mutation Rates in  
760 Experimental Populations of E. Coli." *Nature* 387 (June): 703–5.
- 761 Levy, Sasha F., Jamie R. Blundell, Sandeep Venkataram, Dmitri A. Petrov, Daniel S. Fisher, and  
762 Gavin Sherlock. 2015. "Quantitative Evolutionary Dynamics Using High-Resolution Lineage  
763 Tracking." *Nature* 519 (7542): 181–86. <https://doi.org/10.1038/nature14279>.
- 764 Li, Yuping, Sandeep Venkataram, Atish Agarwala, Barbara Dunn, Dmitri A. Petrov, Gavin  
765 Sherlock, and Daniel S. Fisher. 2018. "Hidden Complexity of Yeast Adaptation under Simple  
766 Evolutionary Conditions." *Current Biology* 28 (4): 515-525.e6.  
767 <https://doi.org/10.1016/j.cub.2018.01.009>.
- 768 Lo, Y. M.D., W. Z. Mehal, and K. A. Fleming. 1988. "False-Positive Results and the Polymerase  
769 Chain Reaction." *The Lancet* 332 (8612): 679. [https://doi.org/10.1016/S0140-  
770 6736\(88\)90487-4](https://doi.org/10.1016/S0140-6736(88)90487-4).
- 771 Loewe, Laurence, Volker Textor, and Siegfried Scherer. 2003. "High Deleterious Genomic  
772 Mutation Rate in Stationary Phase of Escherichia Coli." *Science* 302 (5650): 1558–60.  
773 <https://doi.org/10.1126/science.1087911>.
- 774 Low-Décarie, Etienne, Marcus Kolber, Paige Homme, Andrea Lofano, Alex Dumbrell, Andrew  
775 Gonzalez, and Graham Bell. 2015. "Community Rescue in Experimental  
776 Metacommunities." *Proceedings of the National Academy of Sciences* 112 (46): 14307–12.

- 777 <https://doi.org/10.1073/pnas.1513125112>.
- 778 Ludecke, Daniel. 2019. "SjPlot: Data Visualization for Statistics in Social Science."  
779 <https://doi.org/10.5281/zenodo.1308157>.
- 780 MacLean, R. C., G. G. Perron, and A. Gardner. 2010. "Diminishing Returns from Beneficial  
781 Mutations and Pervasive Epistasis Shape the Fitness Landscape for Rifampicin Resistance  
782 in *Pseudomonas Aeruginosa*." *Genetics* 186 (4): 1345–54.  
783 <https://doi.org/10.1534/genetics.110.123083>.
- 784 Magtanong, Leslie, Raymond J Andersen, Justin Porter, Sarah L Barker, Corey Nislow, Charles  
785 Boone, Minoru Yoshida, et al. 2009. "A Molecular Barcoded Yeast ORF Library Enables  
786 Mode-of-Action Analysis of Bioactive Compounds." *Nature Biotechnology* 27 (4): 369–77.  
787 <https://doi.org/10.1038/nbt.1534>.
- 788 McGee, Lindsey W., Andrew M. Sackman, Anneliese J. Morrison, Jessica Pierce, Jeremy  
789 Anisman, and Darin R. Rokytka. 2016. "Synergistic Pleiotropy Overrides the Costs of  
790 Complexity in Viral Adaptation." *Genetics* 202 (1): 285–95.  
791 <https://doi.org/10.1534/genetics.115.181628>.
- 792 Minty, Jeremy J., Ann A. Lesnefsky, Fengming Lin, Yu Chen, Ted A. Zaroff, Artur B. Veloso, Bin  
793 Xie, et al. 2011. "Evolution Combined with Genomic Study Elucidates Genetic Bases of  
794 Isobutanol Tolerance in *Escherichia Coli*." *Microbial Cell Factories* 10: 1–38.  
795 <https://doi.org/10.1186/1475-2859-10-18>.
- 796 Ostman, Bjorn, Arend Hintze, and Christoph Adami. 2012. "Impact of Epistasis and Pleiotropy  
797 on Evolutionary Adaptation." *Proceedings of the Royal Society B: Biological Sciences* 279  
798 (1727): 247–56. <https://doi.org/10.1098/rspb.2011.0870>.

- 799 Park, Won Kun, Ji Won Yang, and Hyun Soo Kim. 2015. "Identification of Novel Genes  
800 Responsible for Salt Tolerance by Transposon Mutagenesis in *Saccharomyces Cerevisiae*."  
801 *Journal of Industrial Microbiology and Biotechnology* 42 (4): 567–75.  
802 <https://doi.org/10.1007/s10295-015-1584-y>.
- 803 Pasek, Josh. 2018. "Weights: Weighting and Weighted Statistics."
- 804 Perfeito, Lília, Lisete Fernandes, Catarina Mota, and Isabel Gordo. 2007. "Adaptive Mutations in  
805 Bacteria: High Rate and Small Effects." *Science* 317 (5839): 813–15.  
806 <https://doi.org/10.1126/science.1142284>.
- 807 R Core Team. 2012. "R: A Language and Environment for Statistical Computing." Vienna,  
808 Austria. <http://www.r-project.org/>.
- 809 Reyes, Luis H., Ali S. Abdelaal, and Katy C. Kao. 2013. "Genetic Determinants for n -Butanol  
810 Tolerance in Evolved *Escherichia Coli* Mutants: Cross Adaptation and Antagonistic  
811 Pleiotropy between n -Butanol and Other Stressors." *Applied and Environmental*  
812 *Microbiology* 79 (17): 5313–20. <https://doi.org/10.1128/aem.01703-13>.
- 813 Roth, Frederick P, Andrew M Smith, Fiona Kaper, Corey Nislow, Guri Giaever, Michael J  
814 Thompson, Mark Chee, Lawrence E Heisler, and Joseph Mellor. 2009. "Quantitative  
815 Phenotyping via Deep Barcode Sequencing." *Genome Research* 19 (10): 1836–42.  
816 <https://doi.org/10.1101/gr.093955.109>.
- 817 Rozen, Daniel E., Michelle G J L Habets, Andreas Handel, and J. Arjan G M de Visser. 2008.  
818 "Heterogeneous Adaptive Trajectories of Small Populations on Complex Fitness  
819 Landscapes." *PLoS ONE* 3 (3): 14–17. <https://doi.org/10.1371/journal.pone.0001715>.
- 820 RStudio Team. 2016. "RStudio: Integrated Development Environment for R." Boston, MA:

- 821 RStudio, Inc. <http://www.rstudio.com/>.
- 822 Schoustra, Sijmen E., Thomas Bataillon, Danna R. Gifford, and Rees Kassen. 2009. "The  
823 Properties of Adaptive Walks in Evolving Populations of Fungus." *PLoS Biology* 7 (11).  
824 <https://doi.org/10.1371/journal.pbio.1000250>.
- 825 Selmecki, Anna M., Yosef E. Maruvka, Phillip A. Richmond, Marie Guillet, Noam Shores, Amber  
826 L. Sorenson, Subhajyoti De, et al. 2015. "Polyploidy Can Drive Rapid Adaptation in Yeast."  
827 *Nature* 519 (7543): 349–51. <https://doi.org/10.1038/nature14187>.
- 828 Sinha, Rahul, Geoff Stanley, Gunsagar Singh GS Gulati, Camille Ezran, Kyle Joseph KJ Travaglini,  
829 Eric Wei, CKF Charles Kwok Fai Chan, et al. 2017. "Index Switching Causes 'Spreading-Of-  
830 Signal' Among Multiplexed Samples In Illumina HiSeq 4000 DNA Sequencing." *BioRxiv*,  
831 125724. <https://doi.org/10.1101/125724>.
- 832 Sniegowski, Paul D., Peter G. Dombrowski, and Ethan Fingerman. 2002. "Saccharomyces  
833 Cerevisiae and Saccharomyces Paradoxus Coexist in a Natural Woodland Site in North  
834 America and Display Different Levels of Reproductive Isolation from European  
835 Conspecifics." *FEMS Yeast Research* 1 (4): 299–306. [https://doi.org/10.1016/S1567-  
836 1356\(01\)00043-5](https://doi.org/10.1016/S1567-1356(01)00043-5).
- 837 Swings, Toon, Bram van Den Bergh, Sander Wuyts, Eline Oeyen, Karin Voordeckers, Kevin J.  
838 Verstrepen, Maarten Fauvart, Natalie Verstraeten, and Jan Michiels. 2017. "Adaptive  
839 Tuning of Mutation Rates Allows Fast Response to Lethal Stress in Escherichia Coli." *ELife*  
840 6: 1–24. <https://doi.org/10.7554/eLife.22939>.
- 841 Tekarslan-Sahin, Seyma Hande, Ceren Alkim, and Tugba Sezgin. 2018. "Physiological and  
842 Transcriptomic Analysis of a Salt-Resistant Saccharomyces Cerevisiae Mutant Obtained by



- 843 Evolutionary Engineering.” *Bosnian Journal of Basic Medical Sciences* 18 (1): 55–65.
- 844 <https://doi.org/10.17305/bjbms.2017.2250>.
- 845 Varigny, H. de. 1892. *Experimental Evolution*. London, United Kingdom: MacMillan and Co.
- 846 Venkataram, Sandeep, Barbara Dunn, Yuping Li, Atish Agarwala, Jessica Chang, Emily R. Ebel,
- 847 Kerry Geiler-Samerotte, et al. 2016. “Development of a Comprehensive Genotype-to-
- 848 Fitness Map of Adaptation-Driving Mutations in Yeast.” *Cell* 166 (6): 1585-1596.e22.
- 849 <https://doi.org/10.1016/j.cell.2016.08.002>.
- 850 Visser, J. Arjan G M De, and Daniel E. Rozen. 2006. “Clonal Interference and the Periodic
- 851 Selection of New Beneficial Mutations in Escherichia Coli.” *Genetics* 172 (4): 2093–2100.
- 852 <https://doi.org/10.1534/genetics.105.052373>.
- 853 Visser, J. Arjan G M De, Clifford W. Zeyl, Philip J. Gerrish, Jeffrey L. Blanchard, and Richard E.
- 854 Lenski. 1999. “Diminishing Returns from Mutation Supply Rate in Asexual Populations.”
- 855 *Science* 283 (5400): 404–6. <https://doi.org/10.1126/science.283.5400.404>.
- 856 Wahl, Lindi M., Philip J. Gerrish, and Ivan Saika-Voivod. 2002. “Evaluating the Impact of
- 857 Population Bottlenecks in Experimental Evolution.” *Genetics* 162 (2): 961–71.
- 858 Wikham, Hadley. 2009. *Ggplot2: Elegant Graphics for Data Analysis*. 1st ed. New York: Springer-
- 859 Verlag New York. <https://doi.org/10.1007/978-0-387-98141-3>.
- 860 Zhou, Aifen, Edward Baidoo, Zhili He, Aindrila Mukhopadhyay, Jason K. Baumohl, Peter Benke,
- 861 Marcin P. Joachimiak, et al. 2013. “Characterization of NaCl Tolerance in *Desulfovibrio*
- 862 *Vulgaris* Hildenborough through Experimental Evolution.” *ISME Journal* 7 (9): 1790–1802.
- 863 <https://doi.org/10.1038/ismej.2013.60>.
- 864

865

#### AUTHORS CONTRIBUTIONS

866 J.C.F., C.A.B., P.L., and V.J.F. conceived of and designed the study. P.L., and V.J.F. conducted the  
867 lab work. V.J.F. processed the data, performed the statistical analysis., and created  
868 visualizations. V.J.F., J.C.F., and C.A.B. drafted and edited the manuscript.

869

870

871

#### COMPETING INTERESTS

872 The authors have no competing interests.

873

874

875

#### FUNDING

876 V.F. was supported by funding provided by the National Science Foundation Graduate Research  
877 Fellowship Program (NSF-GRFP) (DGE-1745038) and the Botero and Fay labs. J.C.F. was  
878 supported by the National Institutes of Health (GM080669).

879

880

881

#### ACKNOWLEDGEMENTS

882 The authors thank the members of the Botero and Fay labs, specifically Angela Chira, Trevor  
883 Fristoe, and Emery Longan for ongoing feedback and helpful advice.

884

885

FIGURES

886

887

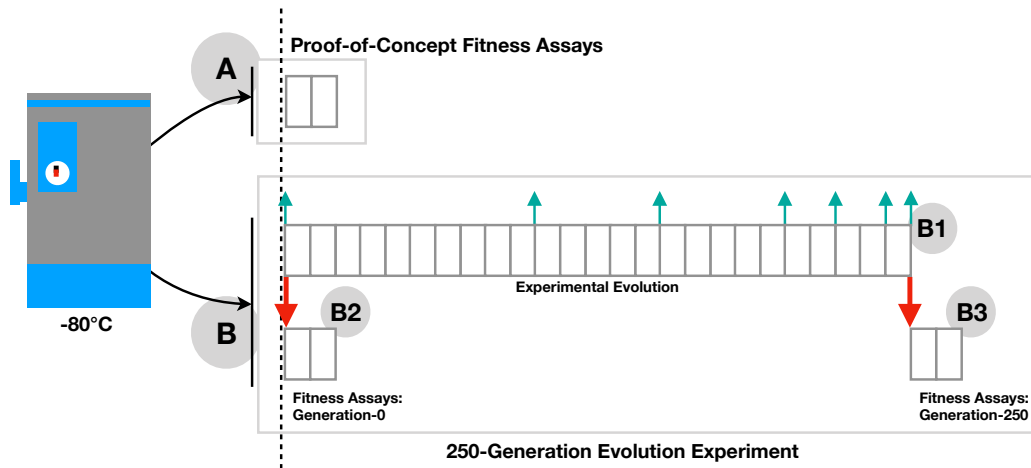

888

889 **Figure 1**

890 Overview of experimental design. Barcoded yeast strains were used for proof-of-concept fitness  
891 assays (A, 2 days) and experimental evolution (B, 25 days) with gray boxes indicating one day  
892 (10 generations). During the 25-day, 250-generation, experimental evolution (B1), evolutionary  
893 dynamics samples were collected at generations 0, 100, 150, 200, 220, 240, and 250 (cyan  
894 arrows). Fitness of the ancestral (B2) and evolved (B3) strains were quantified via (2-day, 20-  
895 generation) fitness assays (red arrows).

896

897

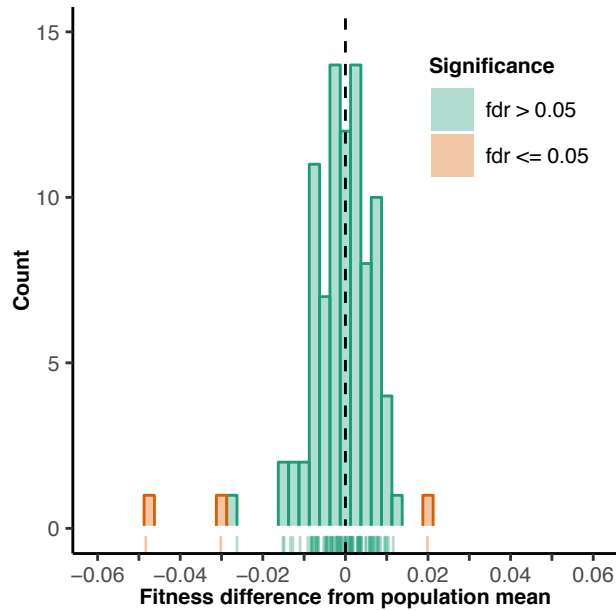

898

899 **Figure 2**

900 Histogram of fitness from 92 barcoded yeast strains. Fitness is the deviation from the  
901 population mean and was quantified by competition against a common reference strain via  
902 Proof-of-concept fitness assay. Orange and cyan bars indicate yeast strains with fitness values  
903 significantly and not significantly different from the population mean at a false discovery rate of  
904 5%, respectively.

905

906

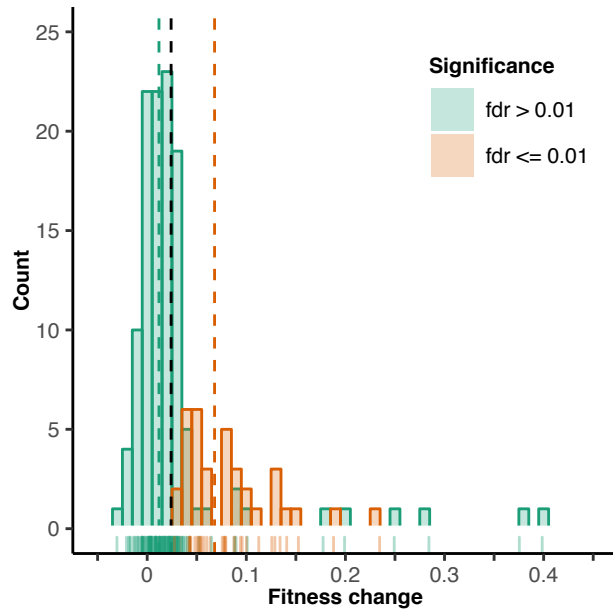

907

908 **Figure 3**

909 Change in fitness over 250 generations of experimental evolution. Histogram depicts fitness

910 increase quantified by competition against a common reference strain. Fitness increase is

911 generation-250 fitness minus generation-0 fitness. Orange and cyan bars indicate strains with

912 fitness values significantly greater or not significantly greater than their own fitness at

913 generation 0 at a false discovery rate of 1%, respectively. No strains significantly decreased in

914 fitness.

915

916

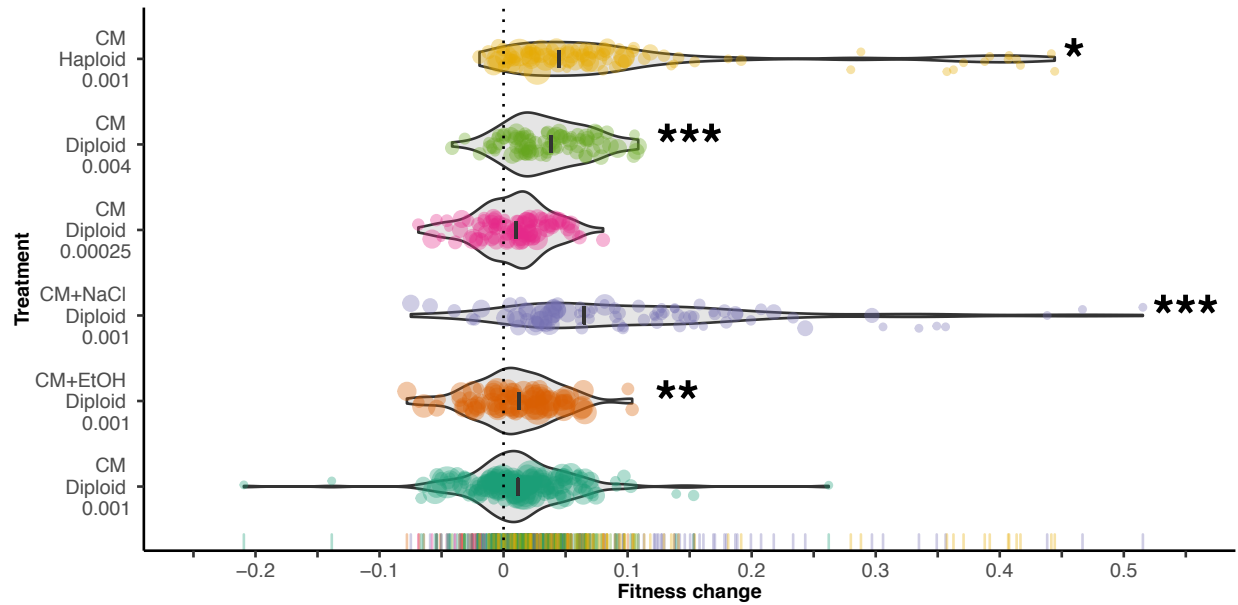

917

918 **Figure 4**

919 Change in fitness across six treatments in 250 generations of experimental evolution. Violin

920 plots show the density of 152 yeast strains' change in fitness with treatment labels indicating

921 the medium, ploidy and dilution rate. Points indicate individual barcodes with sizes reflecting

922 the number of reads underlying each datapoint and colors indicate evolutionary treatments.

923 Treatment mean fitness changes are depicted as heavy black crossbars. Treatments significantly

924 different from the control treatment are marked with an asterisk. The treatment with diploid

925 yeast evolved under a standard 1:1000 transfer dilution in CM is the reference level in this

926 model.

927

928

|              | Treatment |            |             |            |             |
|--------------|-----------|------------|-------------|------------|-------------|
|              | CM + ETOH | CM + NaCl  | 1:4000 dil. | 1:250 dil. | Haploid     |
| t-max        | N.S.      | -48.702 ** | N.S.        | N.S.       | N.S.        |
| m-max        | N.S.      | 0.292 ***  | N.S.        | N.S.       | 0.178 **    |
| t-max-rate   | N.S.      | N.S.       | N.S.        | N.S.       | -52.717 *** |
| m-max-rate   | N.S.      | N.S.       | 0.006 *     | N.S.       | N.S.        |
| t-max-diff   | N.S.      | N.S.       | N.S.        | N.S.       | N.S.        |
| m-max-diff   | N.S.      | 0.175 ***  | N.S.        | N.S.       | 0.204 ***   |
| total change | -0.007 *  | N.S.       | 0.018 *     | N.S.       | -0.007 *    |

929

930 **Table 1**

931 Associations between evolutionary dynamics and evolutionary treatments. Estimates for  
932 significant differences between each evolutionary treatment and the control (CM-diploid,  
933 1:1000 transfer) are shown for seven different measures of barcoded dynamics (t-max, m-max,  
934 t-max-rate, m-max-rate, t-max-diff, m-max-diff, and total change).
