# Supplementary material for: High-throughput analysis of adaptation using barcoded strains of Saccharomyces cerevisiae
Source: bioRxiv preprint, doi:10.1101/731349, version 3 (2020-09-24)
Supplement: Supplmental Table 2 [file 731349_file20.docx]

| ***Treatment ID*** | ***Evo. Wells*** | ***Barcodes per Evo. Well*** | ***Ploidy*** | ***Evo. Medium*** | ***Evo. Transfer Dilution*** |
| --- | --- | --- | --- | --- | --- |
| 1 | 21 | 2 | Diploid | CM | 1/1000 |
| 2 | 11 | 2 | Haploid | CM | 1/1000 |
| 3 | 11 | 2 | Diploid | CM | 1/250 |
| 4 | 11 | 2 | Diploid | CM | 1/4000 |
| 5 | 11 | 2 | Diploid | CM + 8% EtOH | 1/1000 |
| 6 | 11 | 2 | Diploid | CM + 0.342M NaCl | 1/1000 |
